# Supplementary material for: A non-enzymatic electrochemical biosensor based on SiO2–Au nanoparticles for hemoglobin detection
Source: Royal Society of Chemistry journal article supplement (doi:10.1039/c6ay03032g), 2017-01-01
Supplement: c6ay03032g1.pdf [file c6ay03032g1.pdf]

## Supporting Information

# A Non-enzymatic Electrochemical Biosensor Based on SiO<sub>2</sub>-Au Nanoparticles for Hemoglobin Detection

Caihong Li<sup>a</sup>, Jian Li<sup>c</sup>, Haowei Tang<sup>d</sup>, Xiaodi Yang<sup>a,\*</sup>, Qiqi Fei<sup>a</sup>, Chong Sun<sup>b,\*</sup>

<sup>a</sup>Jiangsu Collaborative Innovation Center of Biomedical Functional Materials, Jiangsu Key Laboratory of New Power Batteries, College of Chemistry and Materials Science, Nanjing Normal University, Nanjing 210023, China

<sup>b</sup>Institute of Agricultural Products Processing, Jiangsu Academy of Agricultural Sciences, Nanjing 210014, China

<sup>c</sup>Neurosurgery Department, Affiliated Hospital of Nanjing University of Traditional Chinese Medicine, Nanjing 210029, China

<sup>d</sup>Nanjing Foreign Language School, Nanjing 210008, China

\*Corresponding author.

Dr. Xiaodi Yang

E-mail: [Yangxiaodi@njnu.edu.cn](mailto:Yangxiaodi@njnu.edu.cn)

Tel: +86 (25) 83598493; Fax: +86(25) 83598493

Dr. Chong Sun

E-mail: [sunchong0106@163.com](mailto:sunchong0106@163.com)

Tel: +86 (25) 84390065; Fax: +86(25) 84390065

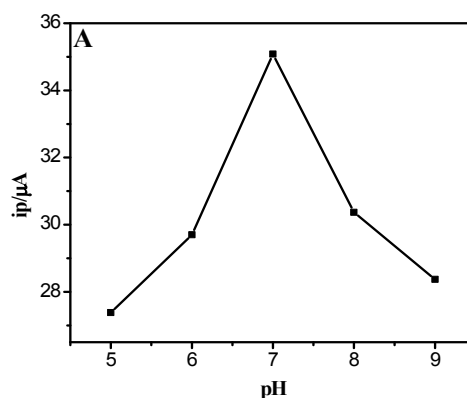

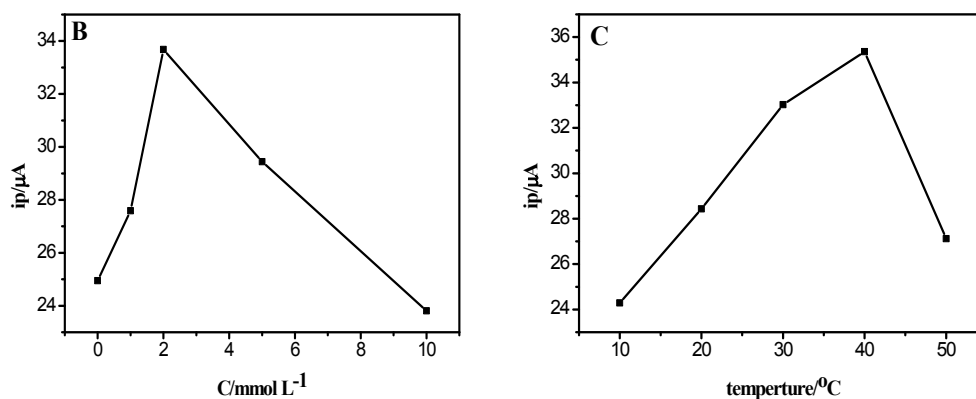

**Fig. S1** The plot for the relationship of (A) the pH value, (B) the concentration of  $\text{H AuCl}_4$  and (C) temperature with electrochemical signal of Hb in 0.1 M PBS (pH=7.0) containing 5 mM  $[\text{Fe}(\text{CN})_6]^{3-/4-}$  (1:1) solution and 0.1 M KCl.

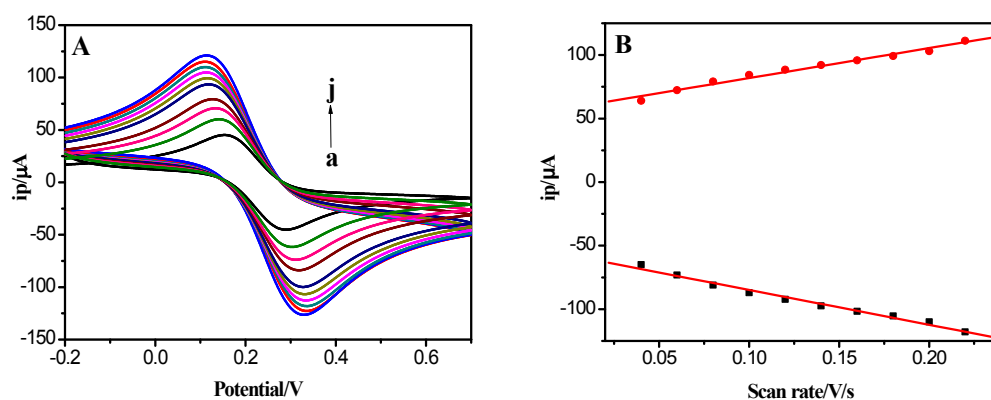

**Fig. S2** CVs of  $\text{SiO}_2\text{-Au}/\text{GCE}$  in 0.1 M PBS (pH=7.0) containing 5 mM  $[\text{Fe}(\text{CN})_6]^{3-/4-}$  (1:1) solution and 0.1 M KCl at different scan rates. Scan rate (from a to j): 0.04, 0.06, 0.08, 0.1, 0.12, 0.14, 0.16, 0.18, 0.2, 0.22 V/s. (B) Plots of peak current vs. scan rate.

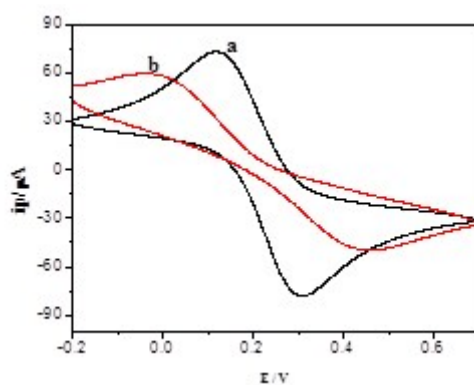

**Fig. S3** (A) CVs of SiO<sub>2</sub>-Au/GCE in 0.1 M PBS (pH = 7.0) containing 5 mM [Fe(CN)<sub>6</sub>]<sup>3-/4-</sup> (1:1) solution and 0.1 M KCl with no Hb (a) and with 0.1 mg/mL Hb (b). Scan rate: 0.1 V/s.

**Table S1** The recovery of Hb at different concentrations

| Samples  | Found before adding (mg/mL) | Added (mg/mL) | Found after adding (mg/mL) | Recovery (%) | RSD (%<br><i>n</i> =3) |
|----------|-----------------------------|---------------|----------------------------|--------------|------------------------|
| Sample 1 | 0.0139                      | 0.3           | 0.314                      | 100.7        | 0.72                   |
| Sample 2 | 0.0139                      | 0.1           | 0.113                      | 93.5         | 0.29                   |
| Sample 3 | 0.0139                      | 0.04          | 0.0533                     | 95.7         | 0.89                   |

**Table S2.** Comparison of analytical performance of biosensor and other determination methods

| Determination methods                 | Linear Range        | Detection limit             | R                      | Slope   | Ref.      |
|---------------------------------------|---------------------|-----------------------------|------------------------|---------|-----------|
| Pencil lead electrode                 | 0.0102-0.146 mg/mL  | 7.48×10 <sup>3</sup> ng/mL  | 0.9955                 | 0.2701  | 43        |
| Bromide-modified silver electrode     | 0.34-4.76 mg/mL     | 1.36 ×10 <sup>5</sup> ng/mL | /                      | /       | 44        |
| PVP/PB NPs modified electrode         | 0.0068-0.816 mg/mL  | 2.72×10 <sup>3</sup> ng/mL  | 0.9993                 | 0.7330  | 45        |
| Photothermal angular light scattering | 3.5-179 mg/mL       | <1.2×10 <sup>6</sup> ng/mL  | /                      | /       | 46        |
| Liquid-liquid microinterface array    | 0.00068-0.034 mg/mL | 326.4 ng/mL                 | 0.9960                 | 7.46    | 47        |
| SiO <sub>2</sub> -Au/GCE              | 0.005-0.5 mg/mL     | 204.46 ng/mL                | R <sup>2</sup> =0.9979 | 83.1411 | This work |

/ represents relevant data which were not provided in these references.
